# Supplementary material for: Sequence Analysis of 96 Genomic Regions Identifies Distinct Evolutionary Lineages within CC156, the Largest Streptococcus pneumoniae Clonal Complex in the MLST Database
Source: PLoS One. 2013 Apr 12;8(4):e61003. doi: 10.1371/journal.pone.0061003 (PMC3625235; doi:10.1371/journal.pone.0061003)
Supplement: Table S1 — Description of the 96-MLST loci set. ID locus name, short description, locus length, coordinates of start and stop on the TIGR4 genome, and number of alleles identified in this study are reported for each locus. (XLSX) [file pone.0061003.s006.xlsx]

## Sheet: Sheet1
	Gene	Annotation	Locus length (bp)	Locus start	Locus stop	Alleles' number
	SP0034	hypotetical protein	706	35166	35871	13
	SP0037	putative glycerol-3-phosphate acyltransferase PlsX	494	37959	38452	18
	SP0057	beta-N-acetylhexosaminidase	415	60615	61029	10
	SP0120	glucose-inhited division protein A	445	123844	124288	22
	SP0127	hypothetical glycoprotease family protein	709	128337	129045	17
	SP0128	ribosomal-protein-alanine acetyltransferase, putative	220	129175	129394	13
	SP0145	hypothetical transporter, major facilitator family protein	442	142796	143237	11
	SP0155	sensor histidine kinase, putative	663	152379	153041	13
	SP0180	DNA-3-methyladenine glycosylase I	267	172857	173123	9
	SP0181	hypothetical caax amino protease family	209	173571	173779	11
	SP0205	anaerobic ribonucleoside-triphosphate reductase activating protein	719	191461	192179	14
	SP0250	PTS system, IIC component	437	219169	219605	11
	SP0266	glucosamine--fructose-6-phosphate aminotransferase	482	240482	240963	14
	SP0278	aminopeptidase PepS	656	255732	256387	16
	SP0334	yllC protein	847	305495	306341	28
	SP0337	phospho-N-acetylmuramoyl-pentapeptide-transferase	483	309362	309844	25
	SP0368	cell wall surface anchor family protein	543	345752	346294	19
	SP0383	phosphomevalonate kinase	687	363516	364202	19
	SP0386	sensor histidine kinase, putative	629	366328	366956	19
	SP0436	aspartyl/glutamyl-tRNA amidotransferase subunit B	644	409906	410549	13
	SP0439	peptide chain release factor 3	253	413721	413973	7
	SP0483	ABC transporter, ATP-binding protein	666	464340	465005	17
	SP0526	response regulator BlpR	543	505463	506005	15
	SP0558	hypothetical valyl-tRNA synthetase	400	527326	527725	11
	SP0562	hypothetical hemerythrin HHE cation binding domain subfamily, putative	599	528396	528994	13
	SP0581	phenylalanyl-tRNA synthetase subunit beta	604	550340	550943	15
	SP0582	hypothetical endonuclease/exonuclease/phosphatase family	428	552518	552945	12
	SP0614	tributyrin esterase	606	581609	582214	20
	SP0618	excinuclease ABC subunit C	708	586482	587189	23
	SP0627	hypothetical peptidase, M42	611	594361	594971	14
	SP0680	ribosomal small subunit pseudouridine synthase A	485	652942	653426	12
	SP0689	undecaprenyldiphospho-muramoylpentapeptide beta-N-acetylglucosaminyltransferase	500	661015	661514	12
	SP0690	cell division protein DivIB	656	662121	662776	11
	SP0701	orotidine 5‘-phosphate decarboxylase	542	668064	668605	10
	SP0717	hydroxyethylthiazole kinase	465	683460	683924	9
	SP0793	3-ketoacyl-(acyl-carrier-protein) reductase	441	747086	747526	12
	SP0806	DNA gyrase subunit B	671	760406	761076	13
	SP0841	hypothetical methyltransferase small domain superfamily	219	788719	788937	6
	SP0909	hypothetical metallopeptidase (SprT family)	418	862933	863350	11
	SP0930	choline binding protein E	494	882624	883117	12
	SP0931	gamma-glutamyl kinase	570	884130	884699	11
	SP0932	gamma-glutamyl phosphate reductase	459	885699	886157	10
	SP0938	tetrapyrrole methylase family protein	355	889339	889693	13
	SP0954	competence protein CelA	489	901867	902355	12
	SP0975	VacB/Rnb family exoribonuclease	581	919874	920454	12
	SP1007	hypothetical protein SP_1007	294	952257	952550	10
	SP1016	tRNA modification GTPase TrmE	735	961216	961950	13
	SP1121	glycogen branching enzyme	377	1053780	1054156	9
	SP1155	ribosomal biogenesis GTPase	428	1090406	1090833	10
	SP1213	conserved hypothetical protein SP_1213	555	1143457	1144011	11
	SP1238	excinuclease ABC subunit B	471	1168554	1169024	9
	SP1244	signal recognition particle-docking protein FtsY	590	1176842	1177431	10
	SP1245	Cof family protein	517	1177776	1178292	13
	SP1357	ABC transporter, ATP-binding/permease protein	486	1278762	1279247	11
	SP1358	ABC transporter, ATP-binding/permease protein	608	1279187	1279794	9
	SP1380	conserved hypothetical protein SP_1380	604	1303268	1303871	13
	SP1382	cytoplasmic alpha-amylase	414	1304954	1305367	12
	SP1383	alanyl-tRNA synthetase	527	1307412	1307938	13
	SP1419	acetyltransferase	643	1339932	1340574	13
	SP1453	hypothetical enzyme of poly-gamma-glutamate biosynthesis	714	1371518	1372231	13
	SP1474	glycyl-tRNA synthetase subunit beta	559	1387935	1388493	14
	SP1623	cation transporter E1-E2 family ATPase	406	1523444	1523849	13
	SP1674	phosphosugar-binding transcriptional regulator, putative	666	1575331	1575996	14
	SP1734	rRNA methyltransferase RsmB	507	1638302	1638808	10
	SP1736	primosome assembly protein PriA	487	1641658	1642144	17
	SP1781	ribosomal protein L11 methyltransferase	788	1699572	1700359	23
	SP1785	conserved hypothetical protein SP_1785	620	1702830	1703449	22
	SP1811	tryptophan synthase subunit alpha	418	1724844	1725261	13
	SP1812	tryptophan synthase subunit beta	462	1725475	1725936	17
	SP1813	N-(5'-phosphoribosyl)anthranilate isomerase	748	1726354	1727101	19
	SP1817	anthranilate synthase component I	728	1729579	1730306	19
	SP1839	ABC transporter, ATP-binding/permease protein	607	1748787	1749393	13
	SP1852	galactose-1-phosphate uridylyltransferase	464	1760091	1760554	13
	SP1853	galactokinase	538	1761143	1761680	16
	SP1854	galactose operon repressor	625	1761811	1762435	16
	SP1858	TetR family transcriptional regulator	757	1765476	1766232	21
	SP1860	choline transporter	616	1767734	1768349	14
	SP1863	MarR family transcriptional regulator	567	1770440	1771006	15
	SP1908	single-stranded DNA-binding protein	248	1822490	1822737	13
	SP1909	short chain dehydrogenase/reductase family oxidoreductase	789	1822923	1823711	15
	SP1982	hypothetical thiamine pyrophosphokinasese	458	1886752	1887209	15
	SP1992	cell wall surface anchor family protein	606	1895429	1896034	12
	SP2000	DNA-binding response regulator	264	1903829	1904092	10
	SP2052	competence protein CglB	847	1952777	1953623	14
	SP2095	5-formyltetrahydrofolate cyclo-ligase family protein	704	2002978	2003681	20
	SP2096	Protein:M20/M25/M40 family peptidase	626	2003625	2004250	7
	SP2120	hypothetical membrane protein	233	2031560	2031792	9
	SP2121	histidyl-tRNA synthetase	498	2033183	2033680	16
	SP2122	hypothetical transporter, major facilitator family	516	2034358	2034873	17
	SP2141	glycosyl hydrolase-related protein	479	2050999	2051477	13
	SP2142	ROK family protein	618	2052759	2053376	20
	SP2144	hypothetical twin-arginine translocation pathway signal	529	2056689	2057217	19
	SP2158	L-fucose isomerase	674	2073274	2073947	19
	SP2191	hypothetical isoprenylcysteine carboxyl methyltransferase (ICMT) family protein	359	2112235	2112593	20
	SP2194	ATP-dependent Clp protease, ATP-binding subunit	622	2115981	2116602	28
	SP2198	ABC transporter, permease protein	485	2120045	2120529	27
